# Supplementary material
Source: PubMed Central journal article supplement (PMC4169336)
Supplement: NIHMS619474-supplement-2.pdf [file NIHMS619474-supplement-2.pdf]

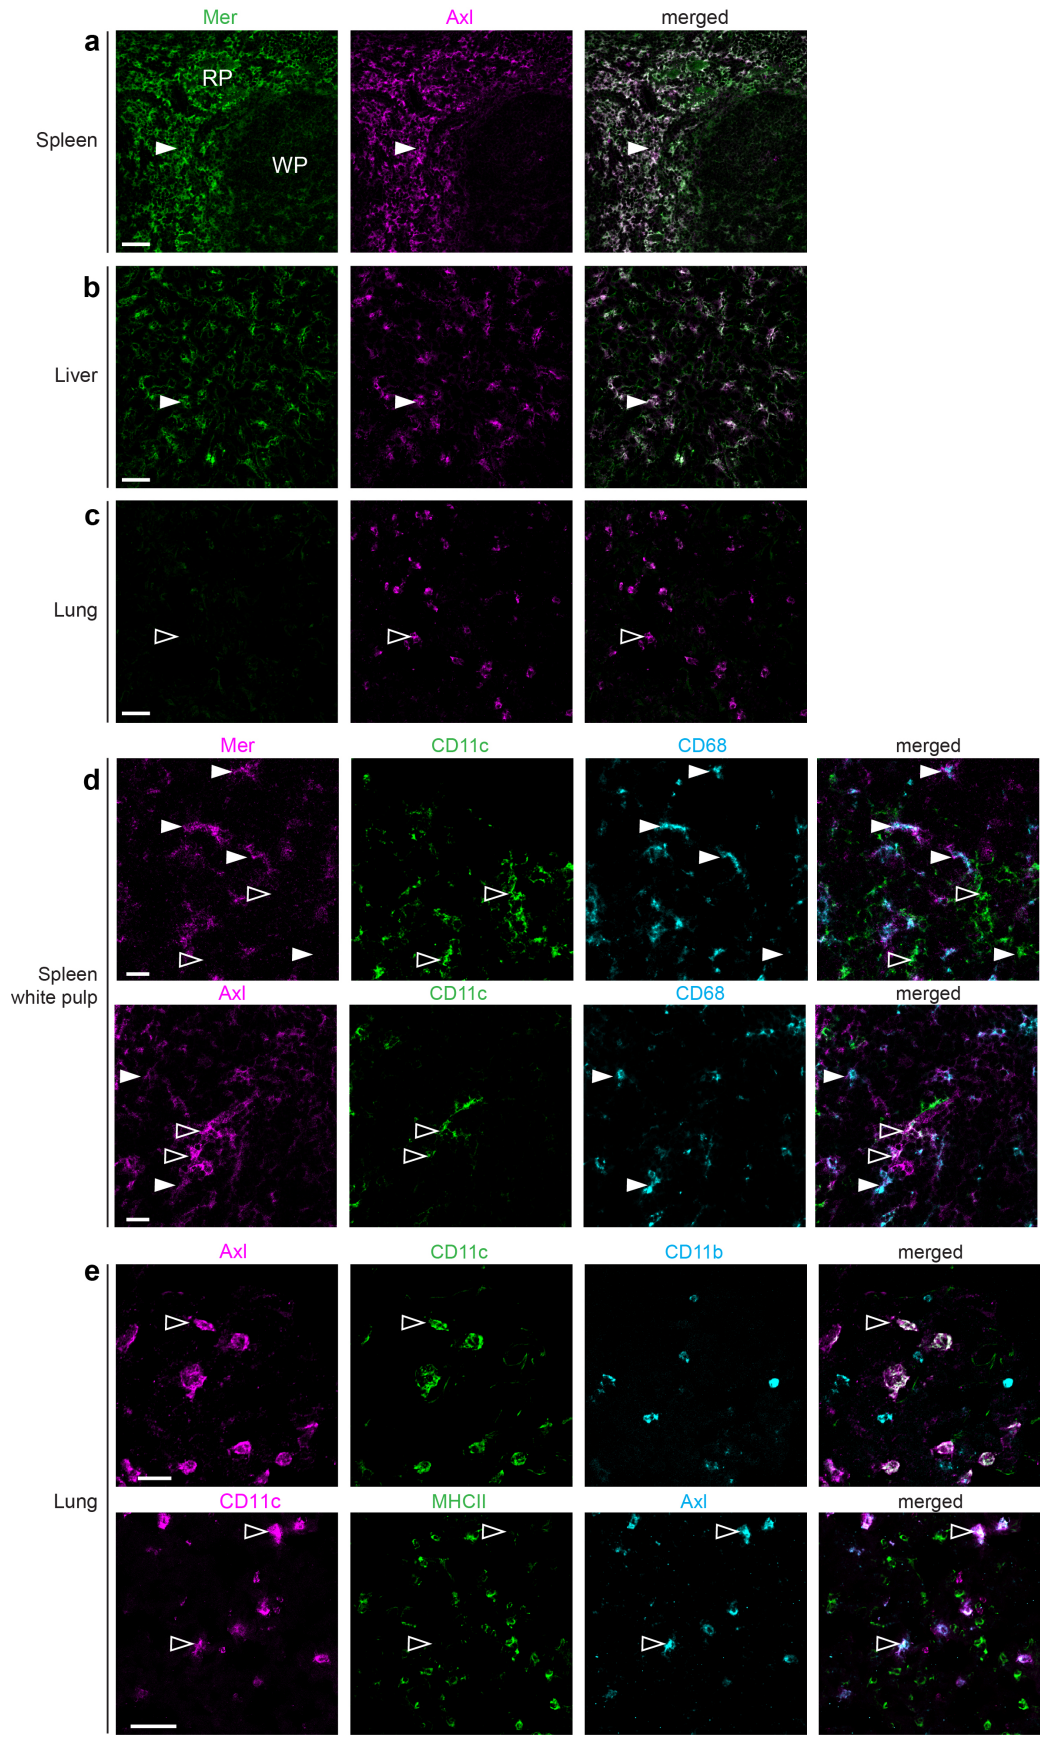

**Supplementary Figure 1 (previous page)**

**Axl and Mer expression on immune cell populations *in vivo*.**

Immunohistochemistry of Axl and Mer in spleen (**a**), liver (**b**), and lung (**c**). Closed arrowheads: cells co-expressing Axl and Mer; open arrowheads: cells expressing mostly Axl. In the spleen, the principal Axl-Mer co-expressing cells are F4/80<sup>+</sup> red pulp (RP) macrophages. In the splenic white pulp (WP) (**d**), Tingible body macrophages (F4/80<sup>+</sup>CD68<sup>+</sup>) express Mer and low levels of Axl (closed arrowheads), whereas a subpopulation of splenic CD11c<sup>+</sup> DCs express only Axl (open arrowheads). In the lung (**c** and **e**), alveolar macrophages (CD11c<sup>+</sup>CD11b<sup>-</sup>MHCII<sup>+</sup>F4/80<sup>lo</sup>) are only Axl-positive (open arrowheads). In the liver, F4/80<sup>+</sup> Kupffer cells are both Axl and Mer positive (**b**, closed arrowheads). Bars, 50  $\mu\text{m}$  (**a-c**); 10  $\mu\text{m}$  (**d**); and 20  $\mu\text{m}$  (**e**). Representative images from n=3 mice.

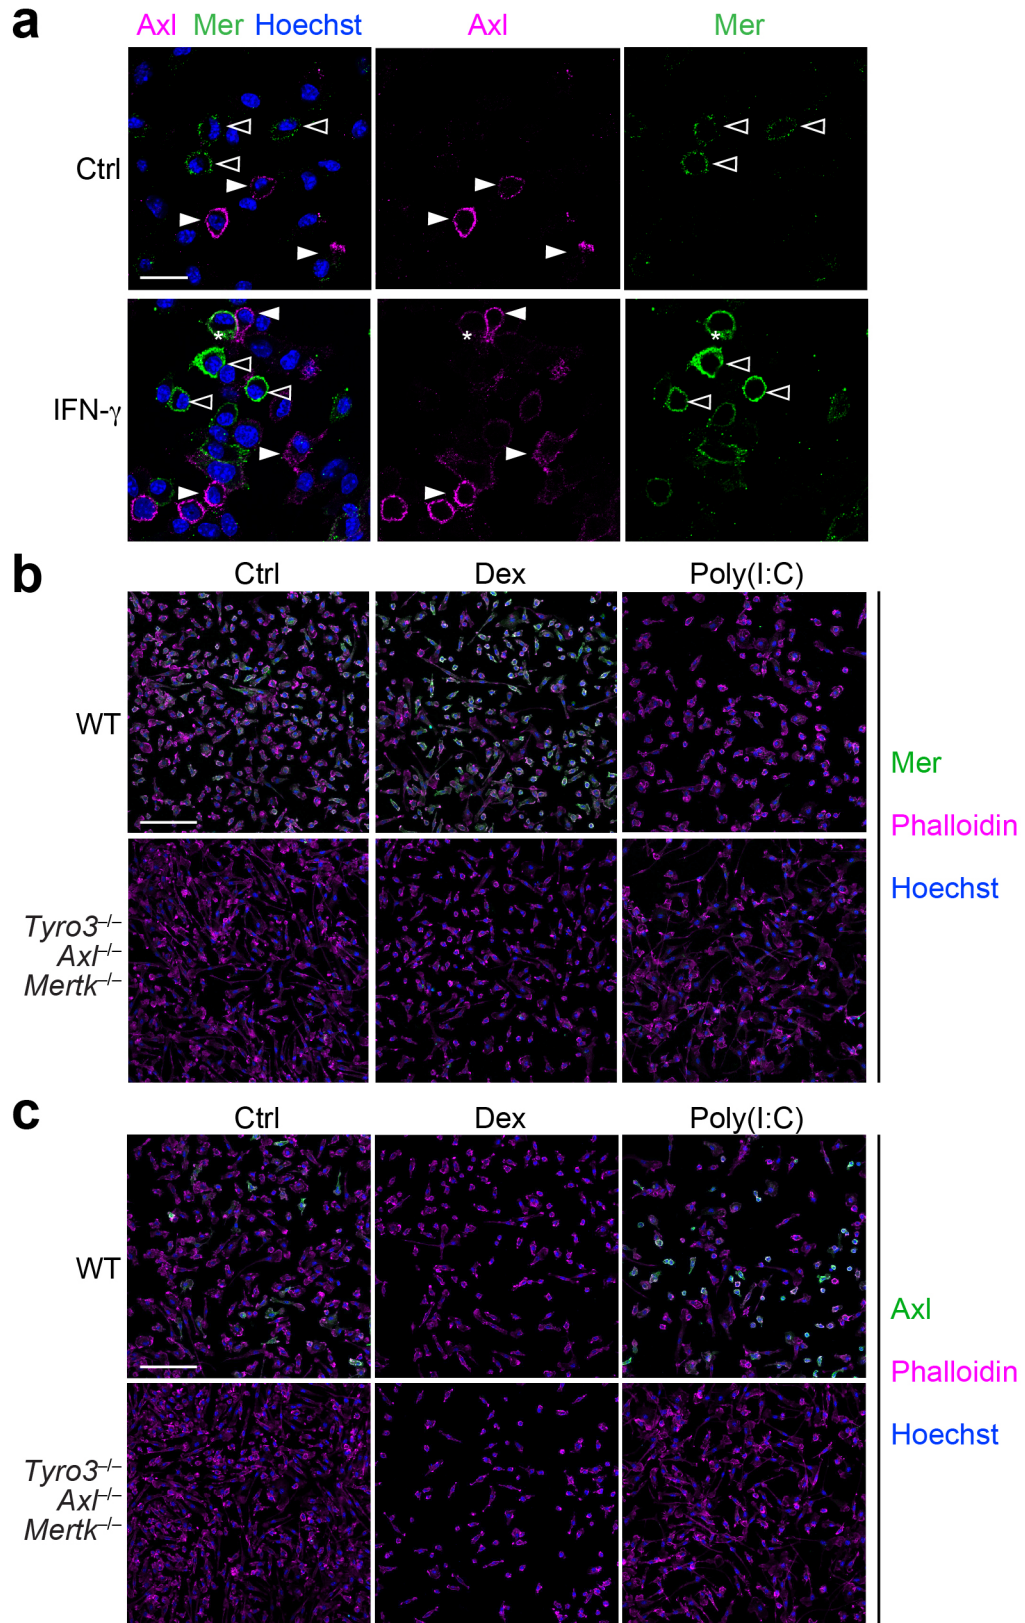

**Supplementary Figure 2 (previous page)**

**Discrete Axl<sup>+</sup> and Mer<sup>+</sup> cell populations *in vitro*.**

**(a)** Unstimulated (Ctrl) or IFN- $\gamma$  (250 U/ml, 18 h) treated BMDM cultures were stained live with Mer (green) and Axl (magenta) antibodies. Closed arrows: cells expressing mostly Axl; open arrows- cells expressing mostly Mer. The asterisk marks a single cell that is weakly positive for both Axl and Mer. Bar, 20  $\mu$ m. Representative images of three independent experiments.

**(b,c)** BMDM cultures were stimulated with 0.1  $\mu$ M Dex or 10  $\mu$ g/ml poly(I:C) for 24 h, fixed and stained with Mer **(b)** or Axl **(c)** antibodies and counterstained with Phalloidin-TRITC. Bar, 100  $\mu$ m. Representative images of three independent experiments.

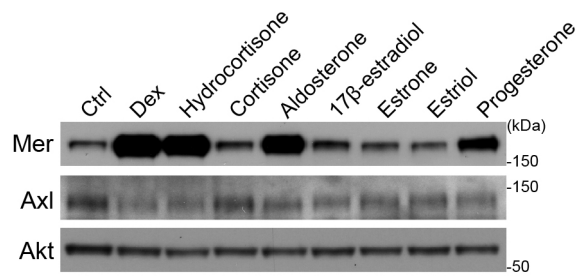

### Supplementary Figure 3

#### Axl and Mer regulation by steroid hormones.

BMDM cultures were stimulated with 1  $\mu$ M Dex, hydrocortisone, cortisone, aldosterone, 17 $\beta$ -estradiol, estrone, estriol or progesterone for 24 h. Axl and Mer expression was assayed by immunoblotting. Representative of two independent experiments.

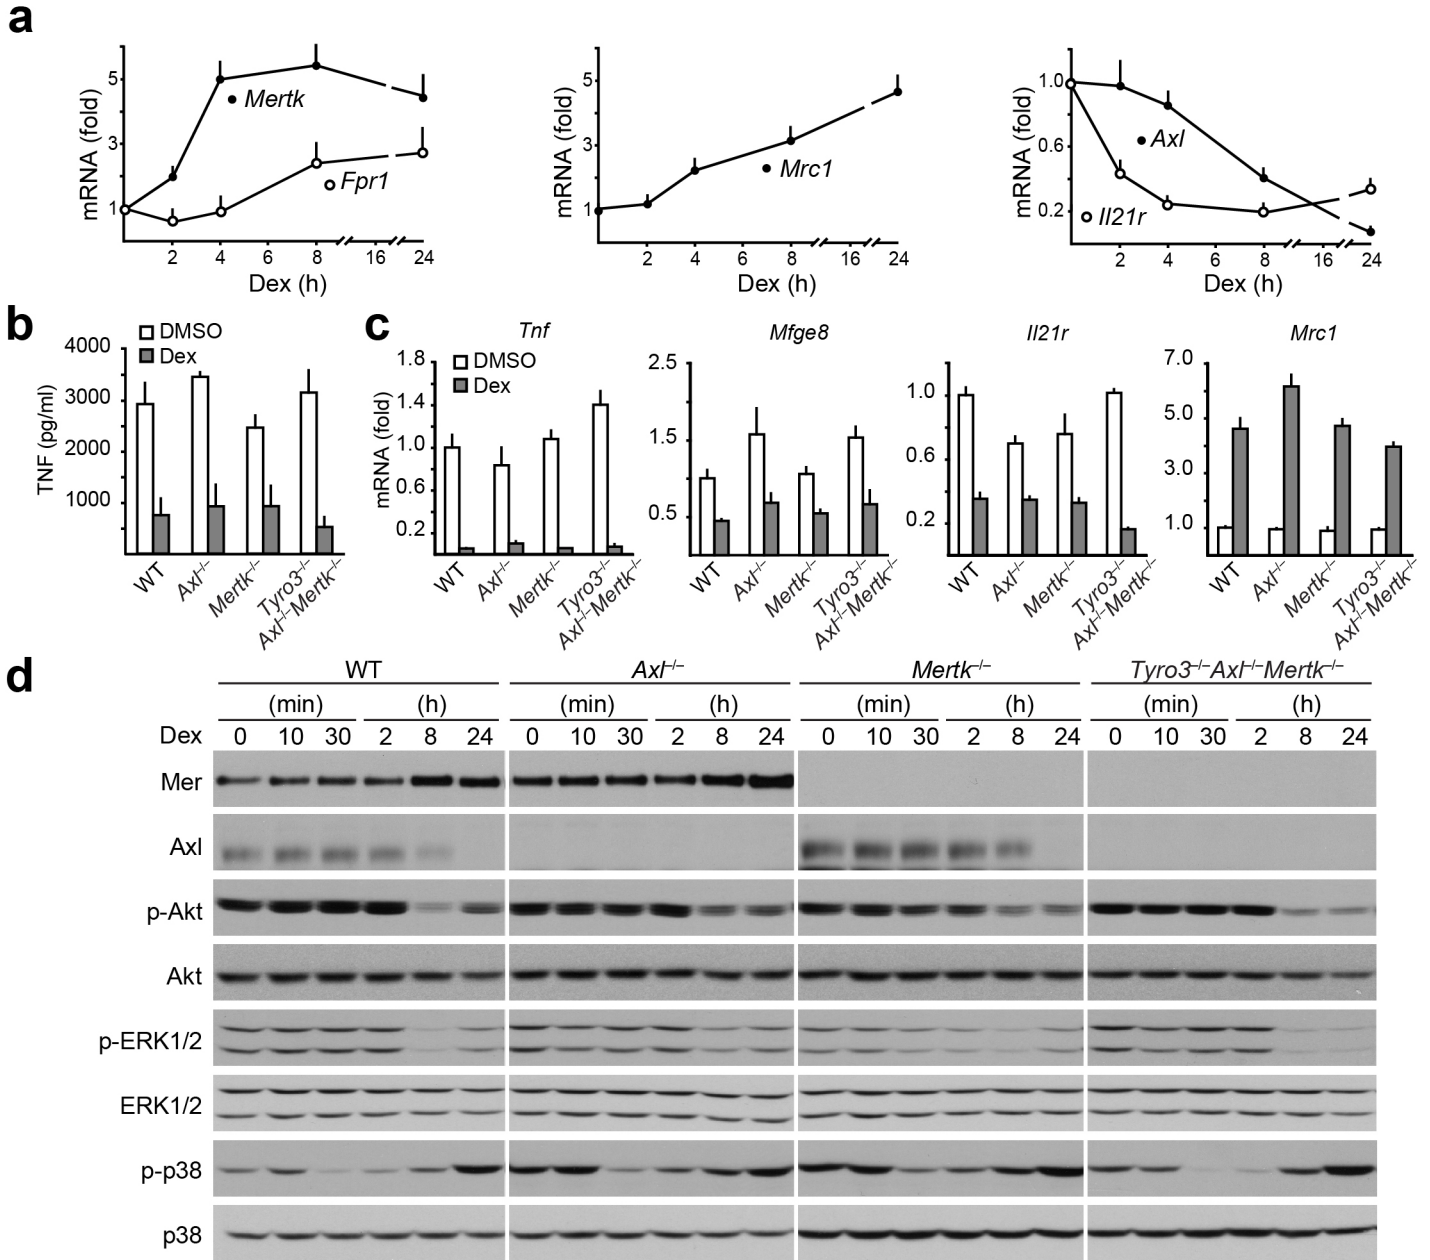

**Supplementary Figure 4**

**Anti-inflammatory effects of Dex are Mer- and Axl-independent.**

(a) RT-qPCR showing the kinetics of *Mertk*, *Fpr1*, *Mrc1* mRNA induction and *Axl* and *Il21r* mRNA inhibition in BMDMs in response to 0.1  $\mu$ M Dex.

(b) BMDMs from indicated mice were treated with 100 ng/ml LPS with or without 0.1  $\mu$ M Dex. TNF secretion was measured 24 h later by ELISA in culture supernatants. Representative of three independent experiments.

(c) RT-qPCR showing changes in *Tnf*, *Mfge8*, *Il21r* and *Mrc1* mRNAs in BMDMs after 24 h incubation with 0.1  $\mu$ M Dex. Data in (a) and (c) are presented as fold of change normalized to *Hprt* mRNA. Average of two independent experiments, each done in technical duplicate, graphed as mean  $\pm$  s.d.

(d) Immunoblot showing changes in activity of Akt, ERK1/2 and p38 signaling pathways in response to 0.1  $\mu$ M Dex treatment of BMDMs derived from indicated knock-out mice. Representative of two independent experiments.

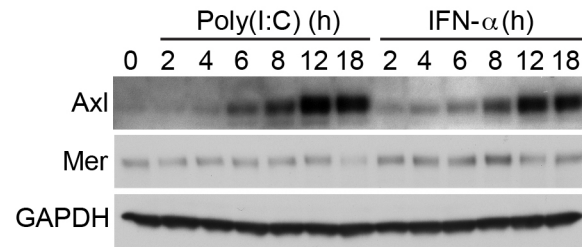

**Supplementary Figure 5**

**Axl induction by poly(I:C) and IFN- $\alpha$  in BMDMs.**

Cells were incubated with either poly(I:C) (1  $\mu$ g/ml) or IFN- $\alpha$  (250 U/ml) for the indicated times in hours (h), and then blotted for total Axl (top), Mer (middle), or GAPDH (bottom). Representative of two independent experiments.

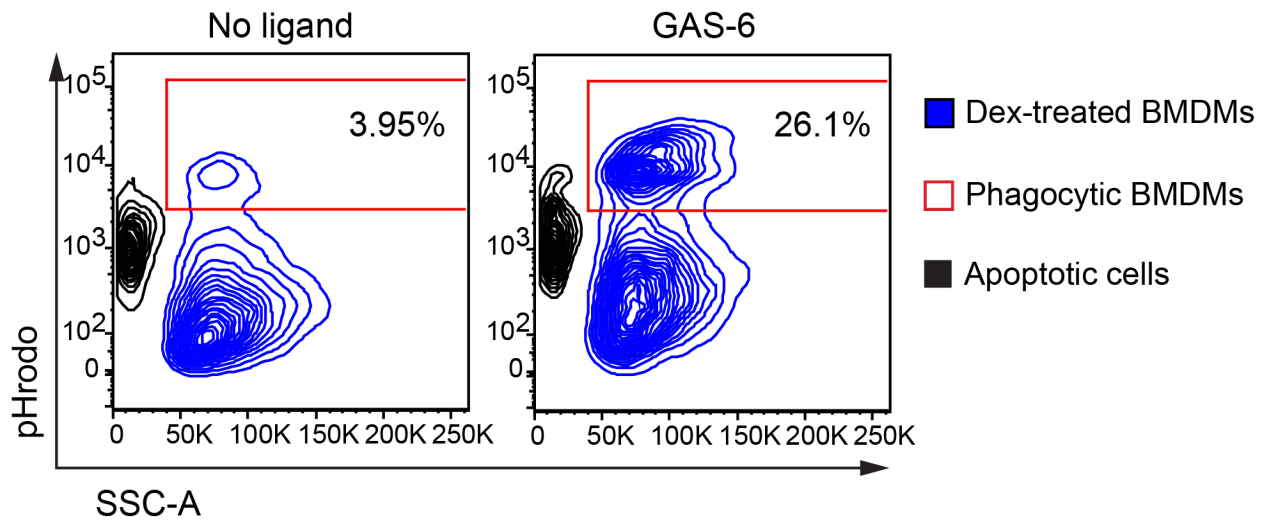

### Supplementary Figure 6

#### Flow cytometry based phagocytosis assay.

Apoptotic cells are labeled with pH-sensitive dye, pHrodo. Once engulfed into the acidic environment of phagosomes, pHrodo fluorescence is enhanced and phagocytic macrophages are distinguished based on their side scatter (SSC-A) and pHrodo fluorescence intensity using flow cytometry. In this experiment, the percent cells in the phagocytic gate is quantified in an 1-hour assay, in absence or presence of 10 nM GAS-6. Representative plot of 6 independent experiments.



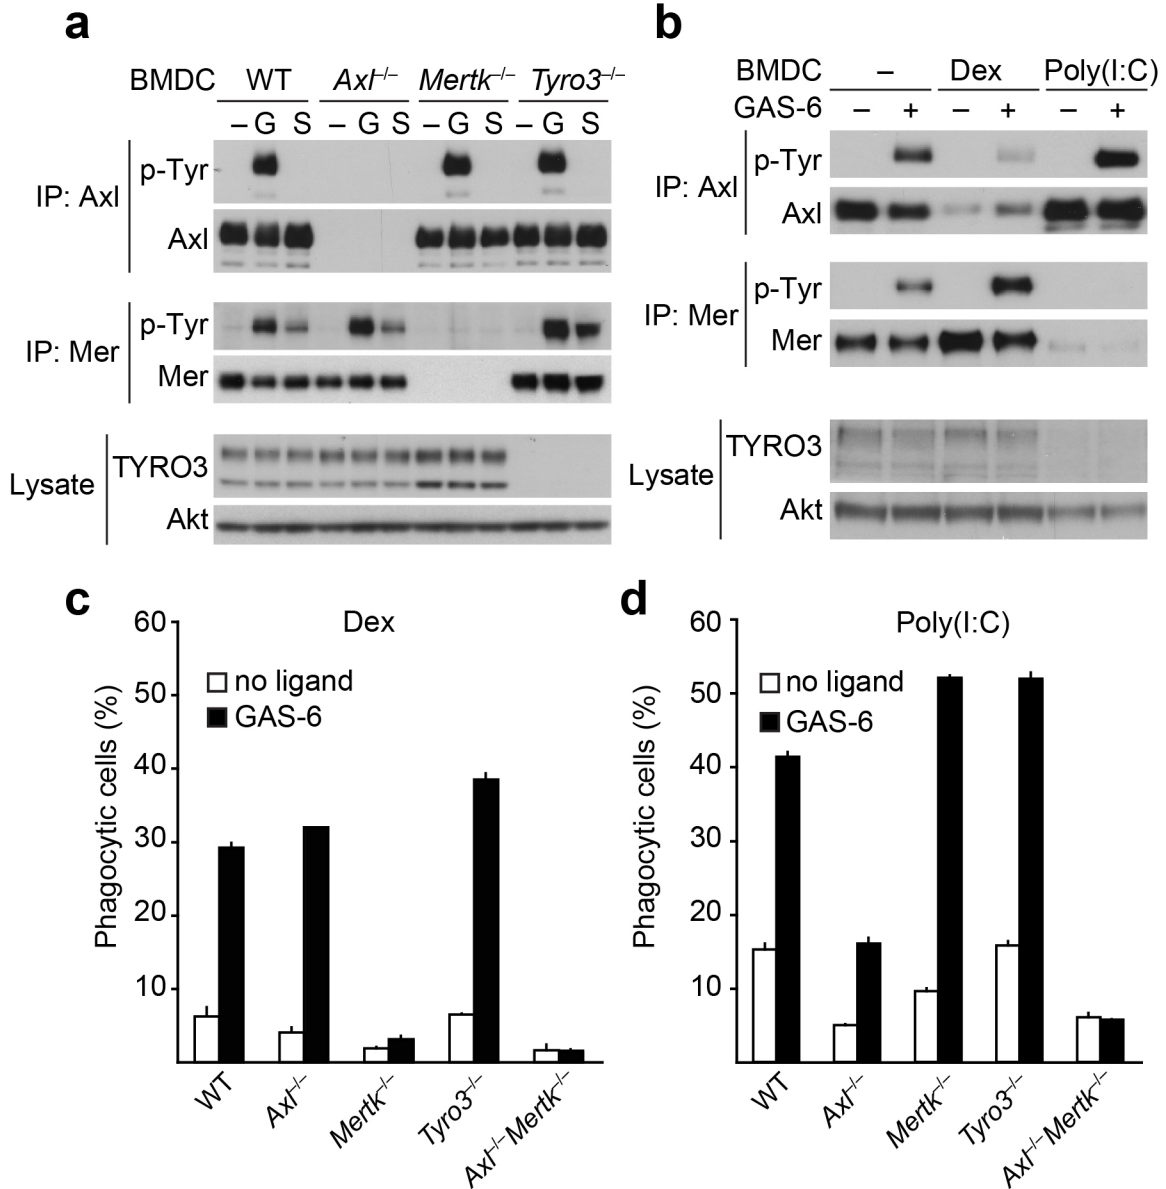

**Supplementary Figure 7**

**Regulation of Axl and Mer expression and phagocytosis in BMDCs.**

(a) BMDC cultures from the indicated mice were stimulated for 10 min with 10 nM GAS-6 (G) or 25 nM Protein S (S). Receptor activation was assayed by immunoprecipitation and immunoblotting. Representative of two independent experiments.

(b) BMDCs were cultured for 18 h in the presence of 0.1  $\mu$ M Dex or 10  $\mu$ g/ml poly(I:C) and then stimulated for 10 min with 10 nM GAS-6. Receptor activation was assayed by immunoprecipitation and immunoblotting. Representative of two independent experiments.

(c, d) BMDCs from mice of the indicated genotypes were cultured for 24 h in the presence of 0.1  $\mu$ M Dex (c) or 10  $\mu$ g/ml poly(I:C) (d) and then incubated for 1 h with pHrodo stained ACs with or without 10 nM GAS-6. Percent of phagocytosis was measured using flow cytometry. Data are presented as mean  $\pm$  s.d. from two independent experiments, each done for duplicate cultures for each condition.

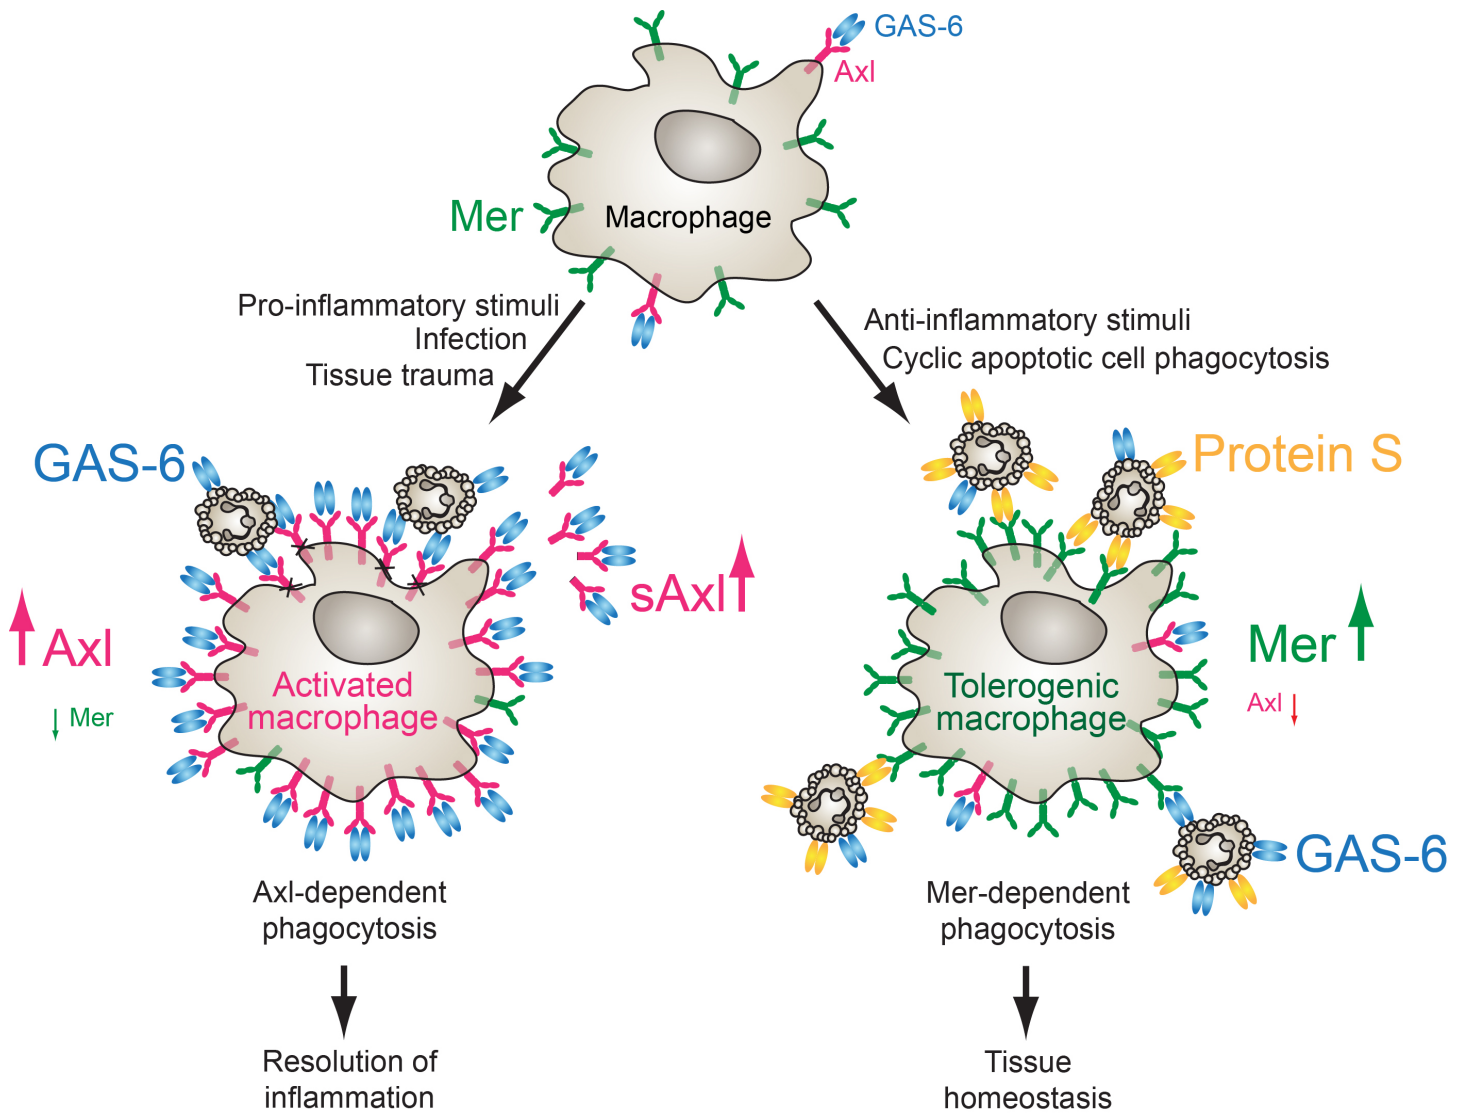

**Supplementary Figure 8**

**Model for the differential regulation and action of Axl and Mer in inflammatory and tolerogenic environments.**

See text for details.
