# Supplementary material
Source: PubMed Central journal article supplement (PMC4169336)
Supplement: NIHMS619474-supplement-3.pdf [file NIHMS619474-supplement-3.pdf]

**Supplementary Table 1. qRT-PCR primers.**

| <b>Target mRNA</b> |                | <b>Primer sequence</b> |
|--------------------|----------------|------------------------|
| Mertk              | Forward primer | GATTCTGGCCAGCACAAACAGA |
|                    | Reverse primer | GAGATATCCGGTAGCCCACCA  |
| Tyro3              | Forward primer | CTGCTCCCTCTCCCTCTGTTT  |
|                    | Reverse primer | GCGTTGTAGCTGGAGATCGTT  |
| Axl                | Forward primer | TGAGCCAACCGTGGAAGAG    |
|                    | Reverse primer | AGGCCACCTTATGCCGATCTA  |
| Gas6               | Forward primer | AACTGGCTGAACGGGGAAG    |
|                    | Reverse primer | CTTCCCAGGTGGTTTCCGT    |
| Nos2               | Forward primer | CTGAACTTGAGCGAGGAGCAG  |
|                    | Reverse primer | CTGGAACTCTGGGCTGTCAGA  |
| Pros1              | Forward primer | CGCCGTGCAAATACCTTGTT   |
|                    | Reverse primer | AATGAGCCAACACGGAATGC   |
| Cyclophilin A      | Forward primer | GCCGATGACGAGCCCTT      |
|                    | Reverse primer | AAGTCACCACCCTGGCACA    |
| Hprt               | Forward primer | TCAGTCAACGGGGACATAAA   |
|                    | Reverse primer | GGGGCTGTACTGCTTAACCAG  |
| Mrc1               | Forward primer | AGTTTCGGGATTGTGGAGC    |
|                    | Reverse primer | CACAGACGGCTCCATTTGC    |
| Frp1               | Forward primer | GATCTGTCCAGAGCTGTTGGAA |
|                    | Reverse primer | CCAGAACGATGTAGCCAGCA   |
| TNF                | Forward primer | GCCACCACGCTCTTCTGTCT   |
|                    | Reverse primer | CAGCTGCTCCTCCACTTGGT   |
| MFGE8              | Forward primer | CGAGTCCCAGCATCAGAGC    |
|                    | Reverse primer | TGTCATTGTCTTGGCCCGT    |
| Il21r              | Forward primer | ACCTGCCTTGGAGGCTATGG   |
|                    | Reverse primer | TGTGGAACCTCTGTGGCACCA  |
| C1qA               | Forward primer | GGCTGAAGATGTCTGCCGAG   |
|                    | Reverse primer | AACCTCGGATACCAGTCCGG   |
| SRA                | Forward primer | ACGCACGTTCAATGACAGCA   |
|                    | Reverse primer | AGGGCAGCCTTGAAGGACTT   |
| LOX-1              | Forward primer | GGTCATCCTCTGCCTGGTGT   |
|                    | Reverse primer | TCTGCCTTCTGCTGGGCTAA   |
| CD68               | Forward primer | AGAGCTCCAAGCTCCCTTGG   |
|                    | Reverse primer | CAAGAGGGACTGGTCACGGT   |
| CD36               | Forward primer | TGGAGCAACTGGTGGATGGT   |
|                    | Reverse primer | TCTACGTGGCCCGTTCTAC    |
| CD14               | Forward primer | GAGCCTATCTGGGCTGCTCA   |
|                    | Reverse primer | TTCCTCGTCTAGCTCGCAGG   |

|                          |                |                       |
|--------------------------|----------------|-----------------------|
| CD91                     | Forward primer | CTGCGCAACACTATTGCCCT  |
|                          | Reverse primer | CTGGTGTGGCCAAGCCATAC  |
| ABC1                     | Forward primer | ATCTCCCGACCCAGCATCT   |
|                          | Reverse primer | CGGGACACTGCCTGGTAGAT  |
| Calreticulin             | Forward primer | GGCCAGACACTGGTGGTACA  |
|                          | Reverse primer | TGAACCTTCTTGGTGCCAGG  |
| MBL                      | Forward primer | CCCTGTCATTGGGGAGGAT   |
|                          | Reverse primer | CCACACACAGAAGGACAGGGA |
| SP-A                     | Forward primer | GGTGCACCTGGAGAACATGG  |
|                          | Reverse primer | GCAAGCTGAGGACTCCCATTG |
| SP-D                     | Forward primer | GAGAAAGAGGTGCCCCTGGT  |
|                          | Reverse primer | CTGTCTGGAAGCCCGCTTT   |
| Integrin $\alpha_V$      | Forward primer | GCGCCTATGAAGCTGAGCTC  |
|                          | Reverse primer | ACGCTGAAACGAAGACCAGC  |
| Integrin $\alpha_M$      | Forward primer | GAACACCAAGGACCGTCTGC  |
|                          | Reverse primer | GAAGGCACGGATACGTGAGC  |
| Integrin $\alpha_X$      | Forward primer | ATCTCCAACCCATGCTGGC   |
|                          | Reverse primer | AGGTCACTTCCCACCACCAG  |
| Integrin $\beta_5$       | Forward primer | CTGTGGTTGGCAGCATCCT   |
|                          | Reverse primer | GGGCTTTCTGTACAGGGGGT  |
| Integrin $\beta_2$       | Forward primer | CTGTTCTGTGGCCAGAAGC   |
|                          | Reverse primer | CTGGACAACCCTTCAGCAGC  |
| C3                       | Forward primer | CAACAACCTACTGCCCGTGG  |
|                          | Reverse primer | AAGATCTGCTTCGGCGCAT   |
| $\beta_2$ -microglobulin | Forward primer | TCGCTTCAGTCGTACAGCATG |
|                          | Reverse primer | TCCATTCTCCGGTGGGT     |
| Annexin-1                | Forward primer | TCGGAAAGCCTTGCTTGCTC  |
|                          | Reverse primer | ACGTTACGTCTGTCCCCTT   |
| TIM4                     | Forward primer | TGCCTGCTGTGTGGGATTT   |
|                          | Reverse primer | TGGCCTCTTGTGTCTCTGCA  |
| BAI1                     | Forward primer | GATGCTGTGAAGTGCCGTGT  |
|                          | Reverse primer | GTGATAGTTGCTGTGCGGCA  |
| Stabilin-2               | Forward primer | ACGGGGTGGTCCACATCAT   |
|                          | Reverse primer | CTGCAGCCTCGATTGCACT   |
| CD31                     | Forward primer | CTCACGCTGGTGTCTATGC   |
|                          | Reverse primer | CCCATGATGGCAGGCTTTC   |
| Gulp1                    | Forward primer | CCCAGTGCCTTTTGAACCT   |
|                          | Reverse primer | AGCACGGTTCATGGTGTGG   |
| G2A                      | Forward primer | GCCAGAGCCACCTTCACAAG  |
|                          | Reverse primer | AACGGAGGTAACCCCCAGTG  |
| CX3CR1                   | Forward primer | TGACTGGCACTTCCTGCAGA  |
|                          | Reverse primer | AGGGCGTAGAAGACGGACAG  |

|             |                |                         |
|-------------|----------------|-------------------------|
| CX3CL1      | Forward primer | GCACCTCGGCATGACGA       |
|             | Reverse primer | TCATGGCGTCTTGGACCC      |
| P2Y2        | Forward primer | TTACGTGACTGTCCCGAGGG    |
|             | Reverse primer | CCCAGCCTCCAGCATTTTT     |
| ELMO1       | Forward primer | TAAACAGCAGCGCCTGAACC    |
|             | Reverse primer | CTTGGGGGCTCTCTTCCAA     |
| MEGF10      | Forward primer | TGTGCCACATCCCCTCATG     |
|             | Reverse primer | GTCAGCTGGCAATGTCCCA     |
| C1qR (CD93) | Forward primer | CCTCAGAATGCAGCCGACAG    |
|             | Reverse primer | TCAGCAGTCTGTCCCTGGTG    |
| Annexin-2   | Forward primer | CATCCTGACAAACCGCAGCA    |
|             | Reverse primer | GGCCCAAATCACCGTCTC      |
| TSP-1       | Forward primer | CATCATGCCCTGCTCCAAC     |
|             | Reverse primer | CCACTCAGACCAGGGAGACC    |
| Tgm2        | Forward primer | GACTGGATCCGGCAGGAAGA    |
|             | Reverse primer | CTTCCCTCTCCTCGGGTGAC    |
| L-ficolin   | Forward primer | CTGGGAAACTTCCTTGGCG     |
|             | Reverse primer | TAACCCATGGCACAGCTGG     |
| M-ficolin   | Forward primer | GAGCCTGGAAGCCCTGCT      |
|             | Reverse primer | GTGTCTCCAGCTCCTTTTAC    |
| Adiponectin | Forward primer | TAAGCTGGGGTCTGCCTGTC    |
|             | Reverse primer | CATCTTCGGCATGACTGGG     |
| PTX1 (CRP)  | Forward primer | TGGAGAAGCTACTCTGGTGCC   |
|             | Reverse primer | CAGTGGCTTCTTTGACTCTGCTT |
| PTX2 (SAP)  | Forward primer | TTGGATGTTTGTCTTACCAGC   |
|             | Reverse primer | AGCGGAAAGGTCACTGTAGG    |
| PTX3        | Forward primer | GCTGTGCTGGAGGAACTGC     |
|             | Reverse primer | ACAGGATGCACGCTTCCAA     |
